# Supplementary material for: Electrochemical Aptasensing Platform for the Detection of Retinol Binding Protein-4
Source: MDPI journal article supplement (doi:10.3390/bios14020101), 2024-02-16
Supplement: s1 [file s1]

# Electrochemical Aptasensing Platform for the Detection of Retinol Binding Protein—4

Kamila Malecka-Baturo <sup>1</sup>, Paulina Żółtowska <sup>2</sup>, Agnieszka Jackowska <sup>2</sup>,  
Katarzyna Kurzątkowska-Adaszyńska <sup>1</sup> and Iwona Grabowska <sup>1,\*</sup>

<sup>1</sup> Institute of Animal Reproduction and Food Research Polish Academy of Sciences, Tuwima 10,  
10-748 Olsztyn, Poland; k.malecka@pan.olsztyn.pl (K.M.-B.);  
k.kurzatowska-adaszynska@pan.olsztyn.pl (K.K.-A.)

<sup>2</sup> Department of Chemistry, University of Warmia and Mazury, Plac Łódzki 4, 10-721 Olsztyn, Poland;  
paulina.zoltowska2002@gmail.com (P.Ż.); agnieszka.jackowska123@gmail.com (A.J.)

\* Correspondence: i.grabowska@pan.olsztyn.pl

1. The electroactive surface area of the gold working electrode  $A_{\text{eas}}$  was determined by oxygen adsorption measurement and was calculated using the Equations:

$$A_{\text{eas}} = \frac{Q_{\text{Au}}}{Q_H^S} = 0.43 \pm 0.03 \text{ cm}^2 \quad (\text{S1})$$

$$Q_{\text{Au}} = \frac{A_{p,c}}{v} \quad (\text{S2})$$

where  $A_{p,c}$  is the charge of the gold oxide reduction of the gold working electrode,  $v$  is the scan rate (0.1 V/s) and  $Q_H^S$  is the standards reference charge ( $0.00039 \pm 0.00001 \text{ C/cm}^2$ ) suggested for polycrystalline gold [1].

2. The roughness factor  $RF$  was calculated according to the Equation:

$$RF = \frac{A_{\text{aes}}}{A_{\text{geom}}} = 13.7 \pm 1.1 \quad (\text{S3}) [2,3]$$

where  $A_{\text{geom}} = 0.0314 \text{ cm}^2$

3. The electron transfer coefficient  $\alpha$  was calculated using the Equation:

$$|E_p - E_{p/2}| = \frac{1.857RT}{\alpha F} = \frac{47.7}{\alpha} \quad (\text{S4}) [4,5]$$

where  $E_p$  is peak potential,  $E_{p/2}$  is the half wave potential,  $R$  is the universal gas constant ( $8.3145 \text{ J mol}^{-1} \text{ K}^{-1}$ ),  $T$  is room temperature.

4. The heterogeneous electron transfer constant  $k^0$  was calculated according to the Klingler–Kochi method:

$$k^0 = 2.18 \left[ \frac{\alpha D n F v}{RT} \right]^{1/2} e^{-\left[ \frac{\alpha^2 n F}{RT} \right] (E_{p,ox} - E_{p,red})} \quad (\text{S5}) [4,5]$$

where  $\alpha$  was calculated from Eq. (S4),  $D$  is the diffusion coefficient of 5 mM  $\text{Fe}(\text{CN})_6^{3-/4-}$  ( $7.6 \times 10^{-6} \text{ cm}^2 \text{ s}^{-1}$ ),  $F$  is Faraday constant ( $96500 \text{ C mol}^{-1}$ ),  $v$  is scan rate ( $\text{V s}^{-1}$ ),  $E_{p,ox}$  and  $E_{p,red}$  are oxidation and reduction peak potential, respectively.

5. The surface coverage of the thiolated aptamer probe  $\Gamma_{\text{Apt}}$  was calculated using the ability of electrostatic binding of redox cations, such as  $[\text{Ru}(\text{NH}_3)_6]^{3+}$  to the anionic DNA phosphate backbone [6].

The surface concentration of  $[\text{Ru}(\text{NH}_3)_6]^{3+}$  ( $\Gamma_{\text{Ru}}$ ) was calculate according to the following Equation:

$$\Gamma_{\text{Ru}} = \frac{Q}{nFA} \quad (\text{S6})$$

where:  $n$  – number of electrons in redox reaction;  $F$ –Faraday constant [ $\text{C/mol}$ ];  $A$ –the area of the gold working electrode [ $\text{cm}^2$ ].

The aptamer surface densities  $\Gamma_{\text{Apt}}$  were calculated from the Equation:

$$\Gamma_{Apt} = \Gamma_{Ru} \frac{z}{m} N_A \quad (S7)$$

where:  $z$ —charge of the redox molecules;  $m$ —number of nucleotides;  $N_A$ —Avogadro's number.

**Table S1.** Electron transfer coefficients ( $\alpha$ ), electron transfer rate constants ( $k^0$ ) and surface coverage of the thiolated aptamer probe ( $\Gamma_{Apt}$ ) calculated for modified gold electrodes.

| $C_{Apt}$ [ $\mu M$ ]                 | 0.1                          | 1                            | 10                           |
|---------------------------------------|------------------------------|------------------------------|------------------------------|
| $\alpha$                              | $0.28 \pm 0.01$              | $0.20 \pm 0.02$              | $0.13 \pm 0.01$              |
| $k^0$ [cm/s]                          | $0.92 \pm 0.01$              | $0.99 \pm 0.01$              | $1.07 \pm 0.01$              |
| $\Gamma_{Apt}$ [mol/cm <sup>2</sup> ] | $3.1 \pm 0.2 \times 10^{11}$ | $4.8 \pm 0.2 \times 10^{11}$ | $6.0 \pm 0.5 \times 10^{11}$ |

6. The association constant ( $K_A$ ) of the aptamer with RBP-4 was calculated by using a Langmuir isotherm approach [7].

$$k_A C = \frac{R_n - R_0}{R_0} \quad (S8)$$

where  $C$  is a concentration of molecules in the solution, and  $R_0$  and  $R_n$  mean the charge transfer resistance of the layer without and in the presence of particular concentration of RBP-4, respectively.

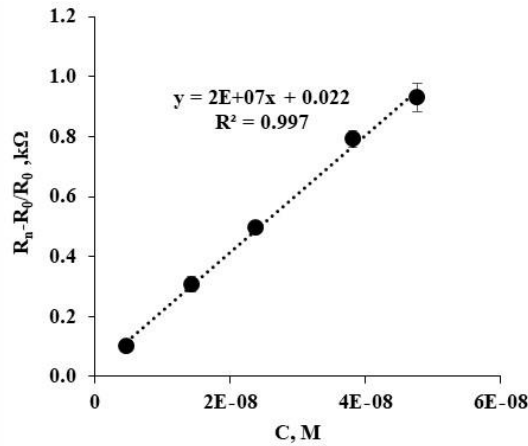

**Figure S1:** The linear relationship of  $(R_n - R_0/R_0)$  vs.  $C$  of RBP-4.

Based on the obtained results, the dissociation constant  $K_D$  was calculated according to the following relationship:

$$K_A = \frac{1}{K_D} \quad (S9) [8]$$

7. Gibbs free energy  $\Delta G$  was calculated using Van't Hoff equation:

$$\Delta G = -RT \ln K_A \quad (S10) [8]$$

**Table S2.** The association constant  $K_A$ , dissociation constant  $K_D$  and Gibbs free energy  $\Delta G$  calculated for gold electrode modified with 0.1  $\mu M$  of RBP-4 aptamer in solution.

| $K_A$ [ $M^{-1}$ ]         | $K_D$ [ $M$ ]                 | $\Delta G$ [kJ/mol] |
|----------------------------|-------------------------------|---------------------|
| $2.0 \pm 0.02 \times 10^7$ | $5.0 \pm 0.05 \times 10^{-8}$ | $-38.2 \pm 1.9$     |

8. The dimensionless electrode kinetic parameter  $K$  was calculated from the Equation:

$$\Delta E_{p/2} = -10.85 \ln(K) + 80 \quad (S11) [9]$$

9. The standard rate constant of electron transfer  $k_s$  was calculated from the Equation:

$$K = k_s(fD)^{-0.5} \quad (S12) [9]$$

where  $f$  is frequency (50 Hz),  $D$  is the diffusion coefficient ( $7.6 \text{ cm}^2 \text{ s}^{-1}$ ).

**Table S3.** The electrode kinetic parameter  $K$ , and the standard rate constant of electron transfer  $k_s$  calculated for gold electrode modified with  $0.1 \text{ } \mu\text{M}$  of RBP-4 aptamer in solution.

| K                 | $k_s$ [cm/s]        |
|-------------------|---------------------|
| $0.255 \pm 0.027$ | $0.0054 \pm 0.0005$ |

10. The selectivity factor  $\alpha_f$  of the proposed aptasensor was estimated using the Equation:

$$\alpha_f = \frac{\left(\frac{\Delta R_{ct}}{R_{ct,0}}\right)_{RBP4}}{\left(\frac{\Delta R_{ct}}{R_{ct,0}}\right)_{Int}} \quad (S13) [10]$$

where  $\left(\frac{\Delta R_{ct}}{R_{ct,0}}\right)_{RBP4}$  and  $\left(\frac{\Delta R_{ct}}{R_{ct,0}}\right)_{Int}$  are normalized responses of the Au/RBP-4 Apt/MCH to RBP-4 protein and interfering agents (Vaspin and Adiponectin).

#### Experiments with positively charged redox-active indicator – hexaammineruthenium (II) chloride

The electrochemical measurements using redox-active indicators with different physical and chemical characteristics are very helpful for evaluation of chemically modified electrodes. Therefore, aptasensor presented was also tested with positively charged redox-active indicator hexaammineruthenium (II) chloride and compared to the negatively charged of ferricyanide/ferrocyanide. Our results clearly showed that when the modified gold electrode was contacted with  $1 \text{ } \mu\text{g/ml}$  RBP-4, the  $\Delta R_{ct}$  value decreased by 10% compared to an approximately 90% increase when ferri/ferro was used.

The obtained results are presented below:

**Table S4.** Summary of  $\Delta E$ ,  $\Delta I$  and  $\Delta R_{ct}$  [%] values obtained using  $1 \text{ mM}$   $[\text{Ru}(\text{NH}_3)_6]\text{Cl}_3$ .

| $C_{RBP4}$ , $\mu\text{g/mL}$ | CV              | OSWV             | EIS                 |
|-------------------------------|-----------------|------------------|---------------------|
|                               | $\Delta E$ , %  | $\Delta I$ , %   | $\Delta R_{ct}$ , % |
| 0.1                           | $7.24 \pm 0.15$ | $-3.08 \pm 1.48$ | $4.59 \pm 0.67$     |
| 0.5                           | $3.64 \pm 0.09$ | $-2.03 \pm 1.35$ | $-3.38 \pm 0.99$    |
| 1                             | $3.56 \pm 0.29$ | $-1.20 \pm 0.78$ | $-9.77 \pm 3.28$    |

To explain this phenomenon, several parameters must be taken into account. Apart from ionic charge, these redox active indicators differ in size, molecular structure and standard electron-transfer rate constant ( $k^0$ ) [11]. Just for example,  $[\text{Ru}(\text{NH}_3)_6]\text{Cl}_3$  is characterized by ca. 10 times higher standard electron-transfer rate constant ( $k^0$ ) than

$K_3[Fe(CN)_6]/K_4[Fe(CN)_6]$ . Additionally, cationic redox markers such as  $[Ru(NH_3)_6]Cl_3$  strongly interact with ssDNA oligonucleotides [12]. Moreover, the isoelectric point of RBP-4 appears to be in the pH range of 4.4 to 4.8 [13]. So, upon complex creation between aptamer and RBP-4, the surface becomes more negatively charged and further attraction occurs, not detected by electrochemical methods using  $[Ru(NH_3)_6]Cl_3$ . Additionally,  $[Ru(NH_3)_6]^{3+}$  are only stable in oxidized state and electrochemical impedance spectroscopy biosensors using this redox probe are not frequently used [14]. Therefore, we recommend to use  $K_3[Fe(CN)_6]/K_4[Fe(CN)_6]$  for aptasensing of RBP-4.

## References:

1. Zaki, M.H.M.; Mohd, Y.; Chin, L.Y. Surface properties of nanostructured gold coatings electrodeposited at different potentials. *J. Electrochem. Sci.* **2020**, *15*, 11401–11415.
2. Xie, X.; Holze, R. Electrode kinetic data: Geometric vs. real surface area. *Batteries* **2022**, *8*, 146.
3. García-Miranda Ferrari, A.; Foster, C.W.; Kelly, P.J.; Brownson, D.A.C.; Banks, C.E. Determination of the electrochemical area of screen-printed electrochemical sensing platforms. *Biosensors* **2018**, *8*, 53.
4. Trachioti, M.G.; Lazanas, A.C.; Prodromidis, M.I. Shedding light on the calculation of electrode electroactive area and heterogeneous electron transfer rate constants at graphite screen-printed electrodes. *Microchim Acta* **2023**, *190*, 251.
5. Forouzanfar, S.; Alam, F.; Pala, N.; Wang, Ch. Highly sensitive label-free electrochemical aptasensors based on photoresist derived carbon for cancer biomarker detection. *Biosens. Bioelectron.* **2020**, *170*, 112598.
6. Ge, B.; Huang, Y.-Ch; Sen, D.; Yu, H.-Z. Electrochemical investigation of DNA-modified surfaces: From quantitation methods to experimental conditions. *J. Electroanal. Chem.* **2007**, *602*, 156–162.
7. Szymańska, I.; Radecka, H.; Radecki, J.; Kaliszan, R. Electrochemical impedance spectroscopy for study of amyloid  $\beta$ -peptide interactions with (–)nicotine ditartrate and (–)cotinine. *Biosens. Bioelectron.* **2007**, *22*, 1955–1960.
8. Sikarwar, B.; Singh, V.V.; Sharma, P.K.; Kumar, A.; Thavaselvam, D.; Boopathi, M.; Singh, B.; Jaiswal, Y.K. DNA-probe-target interaction based detection of *Brucella melitensis* by using surface plasmon resonance. *Biosens. Bioelectron.* **2017**, *87*, 964–969.
9. Khalifa, M.M.; Elkhawaga, A.A.; Hassan, M.A.; Zahran, A.M.; Fathalla, A.M.; El-Said, W.A.; El-Badawy O. Highly specific Electrochemical Sensing of *Pseudomonas aeruginosa* in patients suffering from corneal ulcers: A comparative study. *Sci Rep* **2019**, *9*, 18320.
10. Tabrizi, M.A.; Acedo, P. Highly sensitive aptasensor for the detection of SARS-CoV-2-RBD using aptamer-gated methylene blue@mesoporous silica film/laser engraved graphene electrode. *Biosens. Bioelectron.* **2022**, *215*, 114556.
11. Chailapakul, O.; Crooks, R.M. Interactions between organized, surface-confined monolayers and liquid-phase probe molecules. 4. synthesis and characterization of nanoporous molecular assemblies: mechanism of probe penetration. *Langmuir* **1995**, *11*, 1329–1340.
12. Steichen, M.; Doneux, T.; Buess-Herman, C. On the adsorption of hexaammineruthenium (III) at anionic self-assembled monolayers. *Electrochim. Acta* **2008**, *53*(21), 6202–6208.
13. Peterson, P.A.; Berggård, I. Isolation and Properties of a Human Retinol-transporting Protein, *The Journal of Biological Chemistry* **1971**, *246*, 25–33.
14. Schrattenecker, J.D.; Heer, R.; Melnik, E.; Maier, T.; Faflek, G.; Hainberger, R. Hexaammineruthenium (II)/(III) as alternative redox-probe to Hexacyanoferrat (II)/(III) for stable impedimetric biosensing with gold electrodes. *Biosens. Bioelectron.* **2019**, *127*, 25–30.
